# Supplementary material for: Electronic structures and charge transport mobilities in hybrid organic–inorganic mixed Sn–Pb alloyed perovskites
Source: Royal Society of Chemistry journal article supplement (doi:10.1039/d4nr02037e), 2024-12-06
Supplement: d4nr02037e1.pdf [file d4nr02037e1.pdf]

# **Supplementary Information for**

## **Electronic Structures and Charge Transport Mobilities in Hybrid**

### **Organic-inorganic Mixed Sn-Pb Alloyed Perovskites**

**Pattanasak Teeratchanan<sup>1</sup>, Udomsilp Pinsook<sup>2</sup>, Wutthikrai Busayaporn<sup>3</sup> and**  
**Anusit Thongnum<sup>1,\*</sup>**

<sup>1</sup>Department of Physics, Faculty of Science, Srinakharinwirot University, Bangkok 10110,  
Thailand

<sup>2</sup>Department of Physics, Faculty of Science, Chulalongkorn University, Bangkok 10300,  
Thailand

<sup>3</sup>Synchrotron Light Research Institute (Public Organization), Nakhon Ratchasima 30000,  
Thailand

\*Corresponding author e-mail: [anusit@g.swu.ac.th](mailto:anusit@g.swu.ac.th)

## S1. Structural properties

**Table S1.** Calculated lattice constants ( $a$ ,  $b$ , and  $c$ ), angles between the base vectors ( $\alpha$ ,  $\beta$ , and  $\gamma$ ), and structural volume ( $V$ ) in the  $\text{FA}_{0.75}\text{Cs}_{0.25}\text{Sn}_{1-x}\text{Pb}_x\text{I}_3$  mixed perovskites with a  $2 \times 2 \times 2$  supercell.

| <b>Pb content</b> | $a$ (Å) | $b$ (Å) | $c$ (Å) | $\alpha$ (°) | $\beta$ (°) | $\gamma$ (°) | $V$ (Å <sup>3</sup> ) |
|-------------------|---------|---------|---------|--------------|-------------|--------------|-----------------------|
| $x = 0.0$         | 12.780  | 12.864  | 12.775  | 90.00        | 90.00       | 90.00        | 2100.2345             |
| $x = 0.125$       | 14.355  | 12.763  | 12.671  | 89.50        | 85.65       | 90.64        | 2321.4902             |
| $x = 0.25$        | 14.337  | 12.752  | 12.643  | 89.43        | 86.47       | 91.34        | 2311.4618             |
| $x = 0.375$       | 14.351  | 12.744  | 12.634  | 89.28        | 86.72       | 91.08        | 2310.6214             |
| $x = 0.5$         | 14.392  | 12.900  | 12.518  | 90.00        | 88.89       | 89.99        | 2324.0518             |
| $x = 0.625$       | 14.329  | 12.938  | 12.559  | 89.60        | 85.79       | 90.57        | 2328.2954             |
| $x = 0.75$        | 14.666  | 12.661  | 12.623  | 90.79        | 89.09       | 90.53        | 2343.9172             |
| $x = 0.875$       | 14.680  | 12.621  | 12.657  | 90.55        | 89.08       | 90.57        | 2345.0418             |

**Table S2** Estimated B-I-B angles of the  $\text{FA}_{0.75}\text{Cs}_{0.25}\text{Sn}_{1-x}\text{Pb}_x\text{I}_3$  mixed perovskites with a  $2\times 2\times 2$  supercell in the  $ab$  direction ( $\theta_{ab}$ ) and  $z$  direction ( $\theta_z$ ).

| <b>Pb content</b> | $\theta_{ab}$ (°) | $\theta_z$ (°) |
|-------------------|-------------------|----------------|
| $x = 0.0$         | 162.0012          | 159.3035       |
|                   | 162.0012          | 159.3035       |
|                   | 162.8436          | 163.6155       |
|                   | 162.8436          | 163.6155       |
| $x = 0.125$       |                   | 151.7160       |
|                   |                   | 157.4875       |
| $x = 0.25$        | 162.9221          | 148.3039       |
|                   | 172.7045          | 155.9225       |
|                   |                   | 158.6629       |
| $x = 0.375$       | 164.8589          | 147.9664       |
|                   |                   | 158.4977       |
|                   |                   | 158.6280       |
| $x = 0.5$         | 156.5134          | 165.8015       |
|                   | 156.5134          | 166.9284       |
| $x = 0.625$       | 158.5985          | 142.1254       |
|                   | 158.5985          | 151.7415       |
|                   | 161.5770          |                |
| $x = 0.75$        | 145.275           | 146.4781       |
|                   | 155.5197          | 146.5527       |
|                   |                   | 148.7081       |
|                   |                   | 160.6034       |
| $x = 0.875$       | 146.8620          | 146.4402       |
|                   | 153.5496          | 147.3735       |
|                   |                   | 148.1203       |
|                   |                   | 162.1327       |

**Table S3.** Estimated B-I bond lengths of the  $\text{FA}_{0.75}\text{Cs}_{0.25}\text{Sn}_{1-x}\text{Pb}_x\text{I}_3$  mixed perovskites with a  $2 \times 2 \times 2$  supercell. The B-I bond length is in Å unit.

| x = 0.0           |      | x = 0.125 |         | x = 0.25 |         | x = 0.375 |         | x = 0.5 |         | x = 0.625 |         | x = 0.75 |         | x = 0.875 |         |
|-------------------|------|-----------|---------|----------|---------|-----------|---------|---------|---------|-----------|---------|----------|---------|-----------|---------|
| Sn-I              | Pb-I | Sn-I      | Pb-I    | Sn-I     | Pb-I    | Sn-I      | Pb-I    | Sn-I    | Pb-I    | Sn-I      | Pb-I    | Sn-I     | Pb-I    | Sn-I      | Pb-I    |
| 2.95392           |      | 2.91928   | 3.02175 | 2.93954  | 3.02811 | 2.99497   | 2.98423 | 2.95449 | 3.15751 | 3.00279   | 3.00128 | 3.05219  | 3.00036 | 3.11295   | 3.02139 |
| 2.95392           |      | 2.97706   | 3.16172 | 2.94403  | 3.03547 | 2.99685   | 3.02303 | 2.9681  | 3.18228 | 3.04048   | 3.01909 | 3.10951  | 3.00761 | 3.12458   | 3.04271 |
| 2.95392           |      | 2.98984   | 3.22605 | 2.96601  | 3.15124 | 3.01837   | 3.02315 | 2.9681  | 3.18233 | 3.08336   | 3.03438 | 3.12239  | 3.01489 | 3.28188   | 3.05835 |
| 2.95877           |      | 3.00754   | 3.3446  | 2.96816  | 3.15311 | 3.044     | 3.12096 | 2.96892 | 3.19087 | 3.19731   | 3.04614 | 3.14265  | 3.03679 | 3.31064   | 3.0606  |
| 2.95877           |      | 3.02694   | 3.40114 | 2.98155  | 3.20547 | 3.08568   | 3.15424 | 2.969   | 3.19096 | 3.24798   | 3.05715 | 3.24487  | 3.06188 |           | 3.07756 |
| 2.95877           |      | 3.03697   | 3.67987 | 2.98526  | 3.22062 | 3.09056   | 3.16765 | 3.14818 | 3.20457 | 3.43002   | 3.07952 | 3.3063   | 3.06383 |           | 3.09381 |
| 2.95877           |      | 3.0395    |         | 2.99249  | 3.33381 | 3.11483   | 3.22941 | 3.14823 | 3.20461 | 3.48018   | 3.09578 | 3.30825  | 3.0754  |           | 3.10938 |
| 3.19927           |      | 3.0534    |         | 3.0074   | 3.36832 | 3.13563   | 3.26865 | 3.15381 | 3.31303 |           | 3.12179 | 3.40452  | 3.09056 |           | 3.1469  |
| 3.19927           |      | 3.05355   |         | 3.02278  | 3.40341 | 3.30986   | 3.28448 | 3.15384 | 3.31312 |           | 3.15314 |          | 3.10342 |           | 3.15535 |
| 3.20702           |      | 3.05922   |         | 3.0334   | 3.41663 | 3.3332    | 3.28532 | 3.31832 | 3.33585 |           | 3.18462 |          | 3.10448 |           | 3.1776  |
| 3.20702           |      | 3.09531   |         | 3.07609  | 3.66052 | 3.33832   | 3.29448 | 3.31833 | 3.33596 |           | 3.21167 |          | 3.13497 |           | 3.18373 |
| 3.20702           |      | 3.33626   |         | 3.09844  | 3.68909 | 3.35352   | 3.30915 | 3.31943 | 3.3457  |           | 3.22109 |          | 3.15818 |           | 3.18846 |
| 3.20702           |      | 3.35705   |         | 3.12615  |         | 3.40514   | 3.37239 | 3.31951 | 3.34576 |           | 3.23496 |          | 3.18422 |           | 3.20333 |
| 3.21036           |      | 3.39576   |         | 3.26728  |         | 3.46837   | 3.39613 | 3.48119 | 3.35515 |           | 3.23915 |          | 3.20739 |           | 3.21181 |
| 3.21036           |      | 3.4115    |         | 3.32624  |         | 3.47506   | 3.41324 | 3.48125 | 3.35523 |           | 3.2784  |          | 3.2116  |           | 3.21978 |
| 3.21036           |      | 3.44383   |         | 3.33678  |         | 3.50541   |         |         |         |           | 3.28091 |          | 3.22691 |           | 3.23243 |
| 3.21036           |      | 3.45076   |         | 3.38488  |         |           |         |         |         |           | 3.28636 |          | 3.2323  |           | 3.23824 |
| 3.21696           |      | 3.45608   |         | 3.43087  |         |           |         |         |         |           | 3.33238 |          | 3.25395 |           | 3.24457 |
| 3.21696           |      | 3.46017   |         | 3.45229  |         |           |         |         |         |           | 3.33673 |          | 3.26412 |           | 3.26188 |
| 3.21696           |      |           |         | 3.47626  |         |           |         |         |         |           | 3.35099 |          | 3.26735 |           | 3.26513 |
| 3.24084           |      |           |         | 3.50889  |         |           |         |         |         |           | 3.36524 |          | 3.27457 |           | 3.2676  |
| 3.24084           |      |           |         | 3.51504  |         |           |         |         |         |           | 3.37892 |          | 3.28693 |           | 3.2718  |
| 3.24084           |      |           |         |          |         |           |         |         |         |           | 3.38967 |          | 3.30979 |           | 3.27296 |
| 3.24084           |      |           |         |          |         |           |         |         |         |           | 3.41798 |          | 3.32600 |           | 3.30973 |
| 3.24128           |      |           |         |          |         |           |         |         |         |           | 3.48184 |          | 3.36432 |           | 3.3174  |
| 3.24128           |      |           |         |          |         |           |         |         |         |           | 3.62627 |          | 3.43915 |           | 3.31944 |
| 3.24128           |      |           |         |          |         |           |         |         |         |           |         |          | 3.43948 |           | 3.3583  |
| 3.24235           |      |           |         |          |         |           |         |         |         |           |         |          | 3.44231 |           | 3.36052 |
| 3.24235           |      |           |         |          |         |           |         |         |         |           |         |          | 3.53936 |           | 3.3934  |
| 3.24235           |      |           |         |          |         |           |         |         |         |           |         |          | 3.57092 |           | 3.4200  |
| 3.24235           |      |           |         |          |         |           |         |         |         |           |         |          | 3.59681 |           | 3.5238  |
| 3.2622            |      |           |         |          |         |           |         |         |         |           |         |          |         |           | 3.55709 |
| 3.2622            |      |           |         |          |         |           |         |         |         |           |         |          |         |           | 3.59164 |
| 3.2622            |      |           |         |          |         |           |         |         |         |           |         |          |         |           |         |
| 3.51533           |      |           |         |          |         |           |         |         |         |           |         |          |         |           |         |
| 3.51533           |      |           |         |          |         |           |         |         |         |           |         |          |         |           |         |
| 3.51533           |      |           |         |          |         |           |         |         |         |           |         |          |         |           |         |
| 3.2001            |      | 3.2162    |         | 3.2207   |         | 3.2256    |         | 3.2227  |         | 3.2335    |         | 3.2303   |         | 3.2439    |         |
| Average value (Å) |      |           |         |          |         |           |         |         |         |           |         |          |         |           |         |

**Table S4.** Experimental results of lattice constants ( $a$ ,  $b$ , and  $c$ ) and structural phases in the  $\text{FASn}_{1-x}\text{Pb}_x\text{I}_3$ ,  $\text{FA}_{0.75}\text{Cs}_{0.25}\text{Sn}_{1-x}\text{Pb}_x\text{I}_3$  and  $\text{FA}_{0.83}\text{Cs}_{0.17}\text{Sn}_{1-x}\text{Pb}_x\text{I}_3$  alloyed perovskites measured at room temperature [S1-S4].

| <b>Pb content</b> | $\text{FASn}_{1-x}\text{Pb}_x\text{I}_3$ [S1]                                  |         |         |       | $\text{FASn}_{1-x}\text{Pb}_x\text{I}_3$ [S3]                               |         |         |                            |
|-------------------|--------------------------------------------------------------------------------|---------|---------|-------|-----------------------------------------------------------------------------|---------|---------|----------------------------|
|                   | $a$ (Å)                                                                        | $b$ (Å) | $c$ (Å) | Phase | $a$ (Å)                                                                     | $b$ (Å) | $c$ (Å) | Phase                      |
| $x = 0.0$         | 6.313                                                                          | 8.936   | 8.913   | Amm2  | 6.3074                                                                      | 6.3074  | 6.3074  | $\text{Pm}\bar{3}\text{m}$ |
| $x = 0.125$       | 6.322                                                                          | 8.938   | 8.921   | Amm2  |                                                                             |         |         |                            |
| $x = 0.25$        | 6.321                                                                          | 8.934   | 8.912   | Amm2  | 6.3158                                                                      | 6.3158  | 6.3158  | $\text{Pm}\bar{3}\text{m}$ |
| $x = 0.5$         | 6.416                                                                          | 8.965   | 8.950   | Amm2  | 6.344                                                                       | 6.344   | 6.344   | $\text{Pm}\bar{3}\text{m}$ |
| $x = 0.625$       | 6.415                                                                          | 8.960   | 8.942   | Amm2  |                                                                             |         |         |                            |
| $x = 0.75$        | 6.415                                                                          | 8.960   | 8.942   | Amm2  | 6.3401                                                                      | 6.3401  | 6.3401  | $\text{Pm}\bar{3}\text{m}$ |
| <b>Pb content</b> | $\text{FA}_{0.75}\text{Cs}_{0.25}\text{Sn}_{1-x}\text{Pb}_x\text{I}_3$ [S1,S4] |         |         |       | $\text{FA}_{0.83}\text{Cs}_{0.17}\text{Sn}_{1-x}\text{Pb}_x\text{I}_3$ [S2] |         |         |                            |
|                   | $a$ (Å)                                                                        | $b$ (Å) | $c$ (Å) | Phase | $a$ (Å)                                                                     | $b$ (Å) | $c$ (Å) | Phase                      |
| $x = 0.0$         |                                                                                |         |         |       | 6.278                                                                       | 6.278   | 6.278   | $\text{Pm}\bar{3}\text{m}$ |
| $x = 0.5$         | 6.449                                                                          | 8.925   | 8.903   | Amm2  | 6.292                                                                       | 6.292   | 6.292   | $\text{Pm}\bar{3}\text{m}$ |

**Table S5.** Experimental data of some prominent XRD peaks in pure-Sn and mixed Sn-Pb perovskites [S1-S4].

| <b>material</b>                                                                          | <b>Phase</b>   | <b>XRD peak (2<math>\theta</math>) corresponding to (h,l,k) plane</b> | <b>Ref.</b> |
|------------------------------------------------------------------------------------------|----------------|-----------------------------------------------------------------------|-------------|
| FASnI <sub>3</sub>                                                                       | Pm $\bar{3}$ m | 14° (100), 28° (200)                                                  | [S3]        |
| FA <sub>0.83</sub> CS <sub>0.17</sub> SnI <sub>3</sub>                                   | Pm $\bar{3}$ m | 14° (100), 28° (200)                                                  | [S2]        |
| FASn <sub>0.85</sub> Pb <sub>0.25</sub> I <sub>3</sub>                                   | Pm $\bar{3}$ m | 14° (100), 28° (200)                                                  | [S3]        |
| FASn <sub>0.5</sub> Pb <sub>0.5</sub> I <sub>3</sub>                                     | Pm $\bar{3}$ m | 14° (100), 28° (200)                                                  | [S3]        |
| FA <sub>0.83</sub> CS <sub>0.17</sub> Sn <sub>0.5</sub> Pb <sub>0.5</sub> I <sub>3</sub> | Pm $\bar{3}$ m | 14.° (100), 28° (200)                                                 | [S2]        |
| FASn <sub>0.25</sub> Pb <sub>0.75</sub> I <sub>3</sub>                                   | Pm $\bar{3}$ m | 14° (100), 28° (200)                                                  | [S3]        |
| FASnI <sub>3</sub>                                                                       | Amm2           |                                                                       | [S1]        |
| FASn <sub>0.875</sub> Pb <sub>0.125</sub> I <sub>3</sub>                                 | Amm2           |                                                                       | [S1]        |
| FASn <sub>0.85</sub> Pb <sub>0.25</sub> I <sub>3</sub>                                   | Amm2           | 14.07° (100), 20.02° (110), 24.59° (111),                             | [S1]        |
| FASn <sub>0.5</sub> Pb <sub>0.5</sub> I <sub>3</sub>                                     | Amm2           | 28.35° (200), 31.93° (210), 40.67° (220)                              | [S1]        |
| FA <sub>0.75</sub> CS <sub>0.25</sub> Sn <sub>0.5</sub> Pb <sub>0.5</sub> I <sub>3</sub> | Amm2           |                                                                       | [S1,S4]     |
| FASn <sub>0.375</sub> Pb <sub>0.625</sub> I <sub>3</sub>                                 | Amm2           |                                                                       | [S1]        |
| FASn <sub>0.25</sub> Pb <sub>0.75</sub> I <sub>3</sub>                                   | Amm2           |                                                                       | [S1]        |

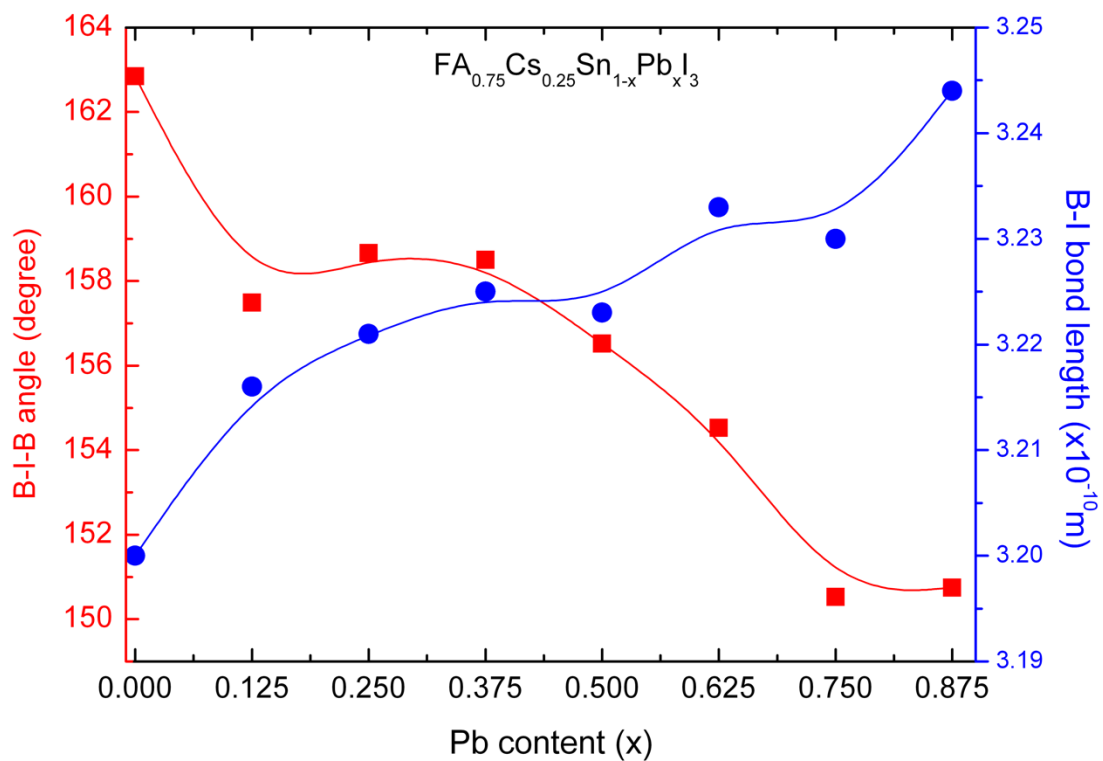

**Figure S1.** Average B-I-B tilting angles and average B-I bond length in the  $\text{FA}_{0.75}\text{Cs}_{0.25}\text{Sn}_{1-x}\text{Pb}_x\text{I}_3$  mixed perovskites with a  $2\times 2\times 2$  supercell as a function of Pb content.

## S2. Electronic band structure

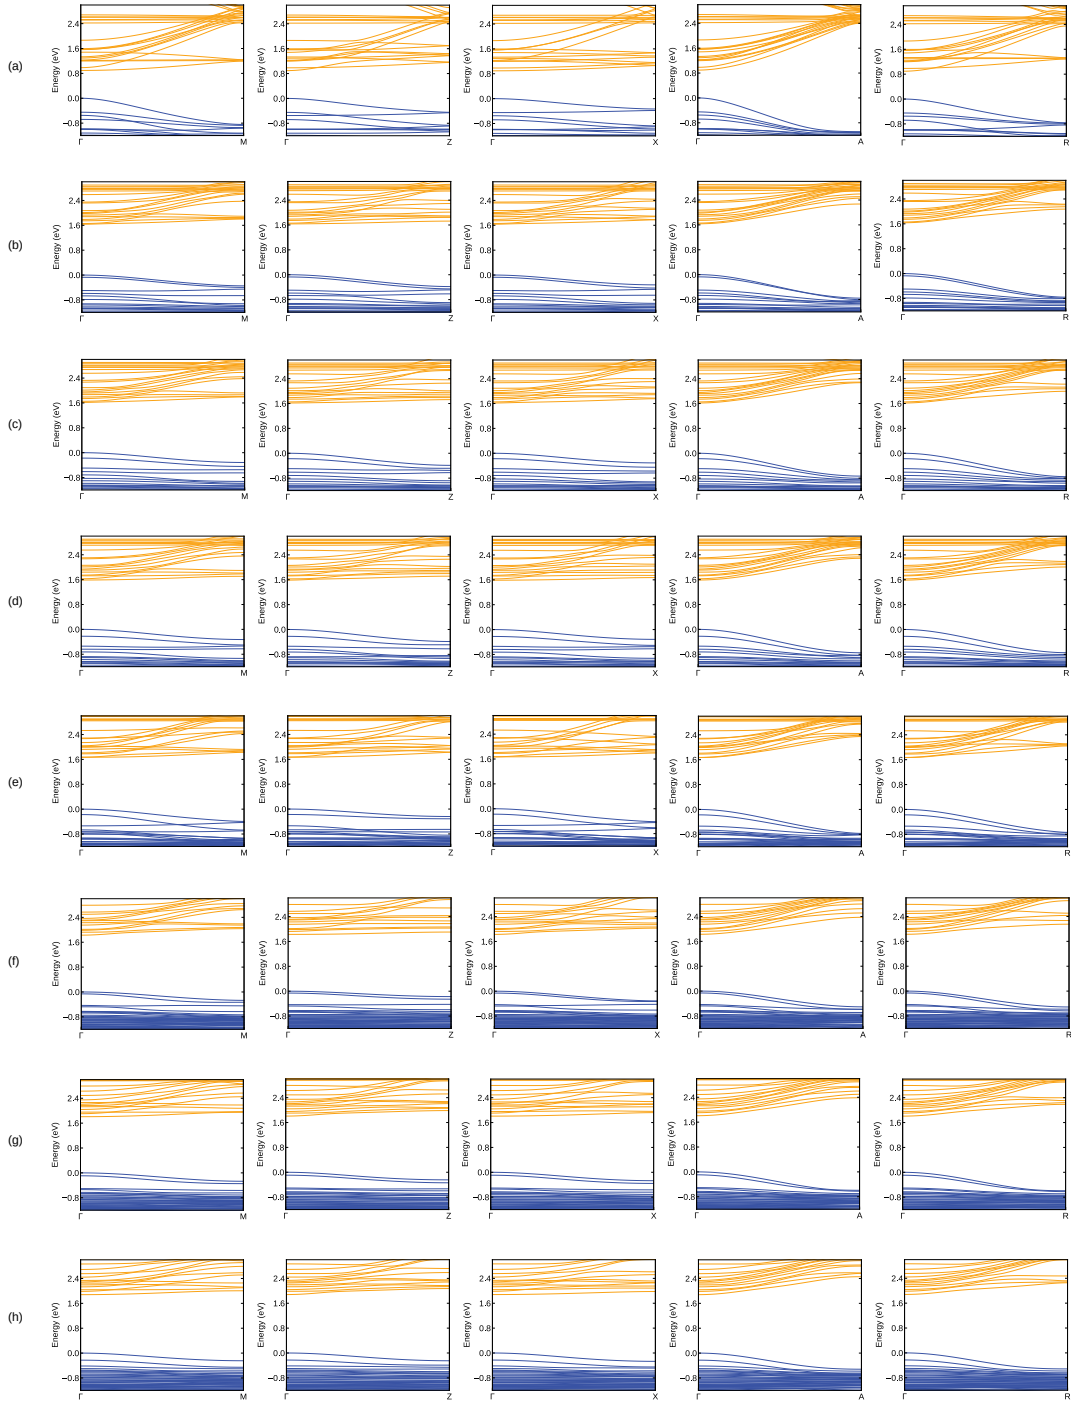

**Figure S2.** Electronic band structures along the high-symmetry point directions,  $\Gamma$ -M,  $\Gamma$ -Z,  $\Gamma$ -X,  $\Gamma$ -A, and  $\Gamma$ -R, for the mixed tin-lead iodide perovskites with (a)  $x = 0.0$ , (b)  $x = 0.125$ , (c)  $x = 0.25$ , (d)  $x = 0.375$ , (e)  $x = 0.5$ , (f)  $x = 0.625$ , (g)  $x = 0.75$ , and (h)  $x = 0.875$ . The VBM is set to zero.



### S3. Carrier effective masses

**Table S6.** Calculated effective masses of electrons and holes along the  $\Gamma$ -high-symmetry point directions in  $\text{FA}_{0.75}\text{CS}_{0.25}\text{Sn}_{1-x}\text{Pb}_x\text{I}_3$  mixed perovskites, where  $m_0$  is the free electron mass.

| Pb content  | ( $\Gamma$ -Z) | ( $\Gamma$ -X) |              | ( $\Gamma$ -M) |              | ( $\Gamma$ -R) |              | ( $\Gamma$ -A) |              |              |
|-------------|----------------|----------------|--------------|----------------|--------------|----------------|--------------|----------------|--------------|--------------|
|             | $m_e^*(m_0)$   | $m_h^*(m_0)$   | $m_e^*(m_0)$ | $m_h^*(m_0)$   | $m_e^*(m_0)$ | $m_h^*(m_0)$   | $m_e^*(m_0)$ | $m_h^*(m_0)$   | $m_e^*(m_0)$ | $m_h^*(m_0)$ |
| $x = 0.0$   | 0.076          | 0.123          | 0.980        | 0.199          | 1.044        | 0.139          | 0.141        | 0.153          | 0.204        | 0.135        |
| $x = 0.125$ | 0.715          | 0.216          | 0.197        | 0.229          | 0.348        | 0.408          | 0.258        | 0.221          | 0.342        | 0.278        |
| $x = 0.25$  | 0.473          | 0.200          | 0.233        | 0.233          | 0.397        | 0.421          | 0.258        | 0.213          | 0.345        | 0.281        |
| $x = 0.375$ | 0.180          | 0.197          | 1.032        | 0.227          | 1.479        | 0.411          | 0.270        | 0.210          | 0.360        | 0.276        |
| $x = 0.5$   | 0.644          | 0.305          | 0.843        | 0.182          | 1.197        | 0.362          | 0.344        | 0.231          | 0.454        | 0.303        |
| $x = 0.625$ | 3.009          | 0.438          | 0.140        | 0.246          | 0.264        | 0.591          | 0.255        | 0.303          | 0.341        | 0.438        |
| $x = 0.75$  | 0.164          | 0.264          | 1.379        | 0.282          | 1.703        | 0.585          | 0.296        | 0.279          | 0.363        | 0.412        |
| $x = 0.875$ | 0.158          | 0.292          | 1.387        | 0.259          | 1.659        | 0.494          | 0.284        | 0.277          | 0.346        | 0.387        |

**Table S7.** Calculated effective masses along the  $\Gamma$ -R and  $\Gamma$ -A directions, average effective masses and reduced masses in  $\text{FA}_{0.75}\text{CS}_{0.25}\text{Sn}_{1-x}\text{Pb}_x\text{I}_3$  mixed perovskites.

| Pb content  | Effective mass ( $\Gamma$ -R) |              | Effective mass ( $\Gamma$ -A) |              | Average mass       |                    | Reduced mass |
|-------------|-------------------------------|--------------|-------------------------------|--------------|--------------------|--------------------|--------------|
|             | $m_e^*(m_0)$                  | $m_h^*(m_0)$ | $m_e^*(m_0)$                  | $m_h^*(m_0)$ | $\bar{m}_e^*(m_0)$ | $\bar{m}_h^*(m_0)$ | $\mu_r(m_0)$ |
|             | $x = 0.0$                     | 0.141        | 0.153                         | 0.204        | 0.135              | 0.172              | 0.144        |
| $x = 0.125$ | 0.258                         | 0.221        | 0.342                         | 0.278        | 0.300              | 0.249              | 0.136        |
| $x = 0.25$  | 0.258                         | 0.213        | 0.345                         | 0.281        | 0.302              | 0.247              | 0.136        |
| $x = 0.375$ | 0.270                         | 0.210        | 0.360                         | 0.276        | 0.315              | 0.243              | 0.137        |
| $x = 0.5$   | 0.344                         | 0.231        | 0.454                         | 0.303        | 0.399              | 0.267              | 0.160        |
| $x = 0.625$ | 0.255                         | 0.303        | 0.341                         | 0.438        | 0.298              | 0.370              | 0.165        |
| $x = 0.75$  | 0.296                         | 0.279        | 0.363                         | 0.412        | 0.329              | 0.345              | 0.168        |
| $x = 0.875$ | 0.284                         | 0.277        | 0.346                         | 0.387        | 0.315              | 0.332              | 0.162        |

#### S4. Charge-carrier mobility

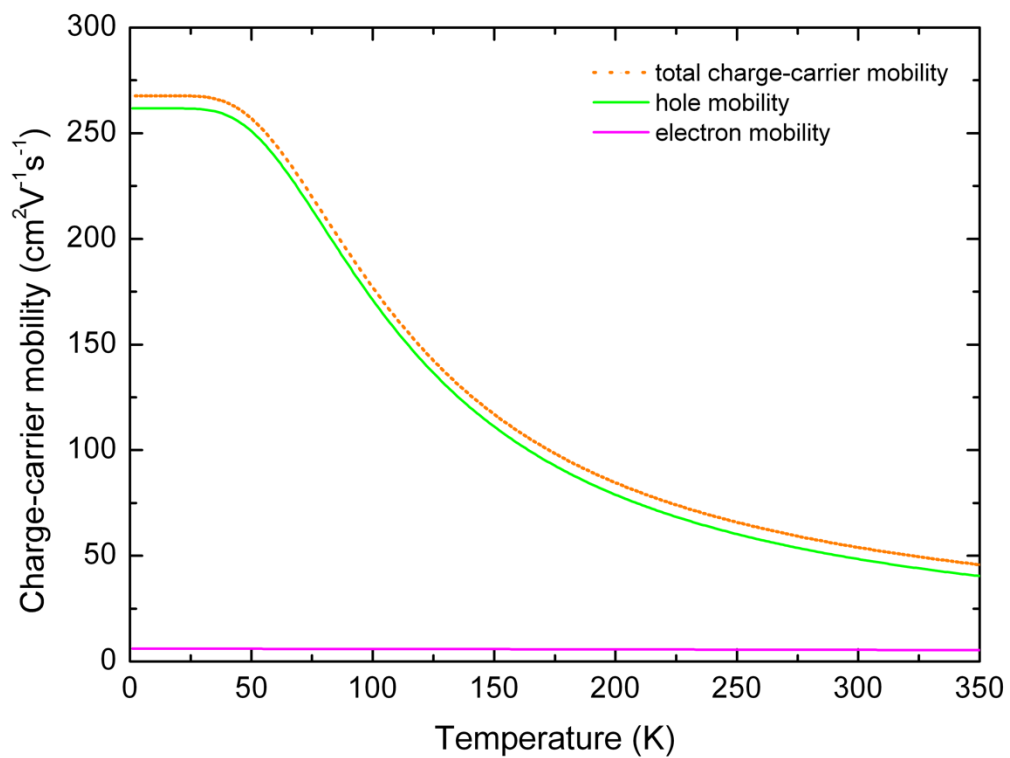

**Figure S3.** Plot of total charge-carrier mobility (dotted orange line), hole mobility (solid green line) and electron mobility (solid magenta line) as a function of temperature, calculated using  $N_I^{(e)} = N_I^{(h)} = 1.0 \times 10^{19} \text{ cm}^{-3}$ , as a function of temperature.

## S5. Comparisons of the carrier effective masses using DFT calculations

**Table S8.** DFT calculations of electron and hole effective masses ( $m_e^*$  and  $m_h^*$ ) with different functionals in pure-Sn, mixed Sn-Pb, and pure-Pb perovskites.

| Material                                                                                     | Functional | $m_e^*(m_0)$ | $m_h^*(m_0)$ | Ref.      |
|----------------------------------------------------------------------------------------------|------------|--------------|--------------|-----------|
| FA <sub>0.75</sub> Cs <sub>0.25</sub> SnI <sub>3</sub>                                       | PBE        | 0.172        | 0.144        | This work |
| FASnI <sub>3</sub>                                                                           | PBE        | 0.29         | 0.14         | [S5]      |
| FASnI <sub>3</sub>                                                                           | PBE        | 0.18         | 0.12         | [S5]      |
| FASnI <sub>3</sub>                                                                           | HSE06      | 0.28         | 0.11         | [S6,S7]   |
| MASnI <sub>3</sub>                                                                           | GW+SOC     | 0.36         | 0.16         | [S8]      |
| FA <sub>0.75</sub> Cs <sub>0.25</sub> Sn <sub>0.75</sub> Pb <sub>0.25</sub> I <sub>3</sub>   | PBE        | 0.302        | 0.247        | This work |
| FA <sub>0.875</sub> Cs <sub>0.125</sub> Sn <sub>0.75</sub> Pb <sub>0.25</sub> I <sub>3</sub> | PBE+SOC    | 0.1          | 0.08         | [S9]      |
| MASn <sub>0.75</sub> Pb <sub>0.25</sub> I <sub>3</sub>                                       | GW+SOC     | 0.23         | 0.14         | [S8]      |
| FA <sub>0.75</sub> Cs <sub>0.25</sub> Sn <sub>0.5</sub> Pb <sub>0.5</sub> I <sub>3</sub>     | PBE        | 0.399        | 0.267        | This work |
| FA <sub>0.75</sub> Cs <sub>0.25</sub> Sn <sub>0.5</sub> Pb <sub>0.5</sub> I <sub>3</sub>     | PBE        | 0.33         | 0.296        | [S10]     |
| FA <sub>0.875</sub> Cs <sub>0.125</sub> Sn <sub>0.5</sub> Pb <sub>0.5</sub> I <sub>3</sub>   | PBE+SOC    | 0.1          | 0.11         | [S9]      |
| MASn <sub>0.5</sub> Pb <sub>0.5</sub> I <sub>3</sub>                                         | GW+SOC     | 0.32         | 0.21         | [S8]      |
| FA <sub>0.75</sub> Cs <sub>0.25</sub> Sn <sub>0.25</sub> Pb <sub>0.75</sub> I <sub>3</sub>   | PBE        | 0.329        | 0.345        | This work |
| FA <sub>0.875</sub> Cs <sub>0.125</sub> Sn <sub>0.25</sub> Pb <sub>0.75</sub> I <sub>3</sub> | PBE+SOC    | 0.13         | 0.14         | [S9]      |
| MASn <sub>0.25</sub> Pb <sub>0.75</sub> I <sub>3</sub>                                       | GW+SOC     | 0.37         | 0.26         | [S8]      |
| FAPbI <sub>3</sub>                                                                           | HSE06+SOC  | 0.184        | 0.213        | [S11]     |
| FA <sub>0.875</sub> Cs <sub>0.125</sub> PbI <sub>3</sub>                                     | PBE+SOC    | 0.13         | 0.19         | [S9]      |
| FA <sub>0.83</sub> Cs <sub>0.17</sub> PbI <sub>3</sub>                                       | GW+SOC     | 0.218        | 0.273        | [S12]     |

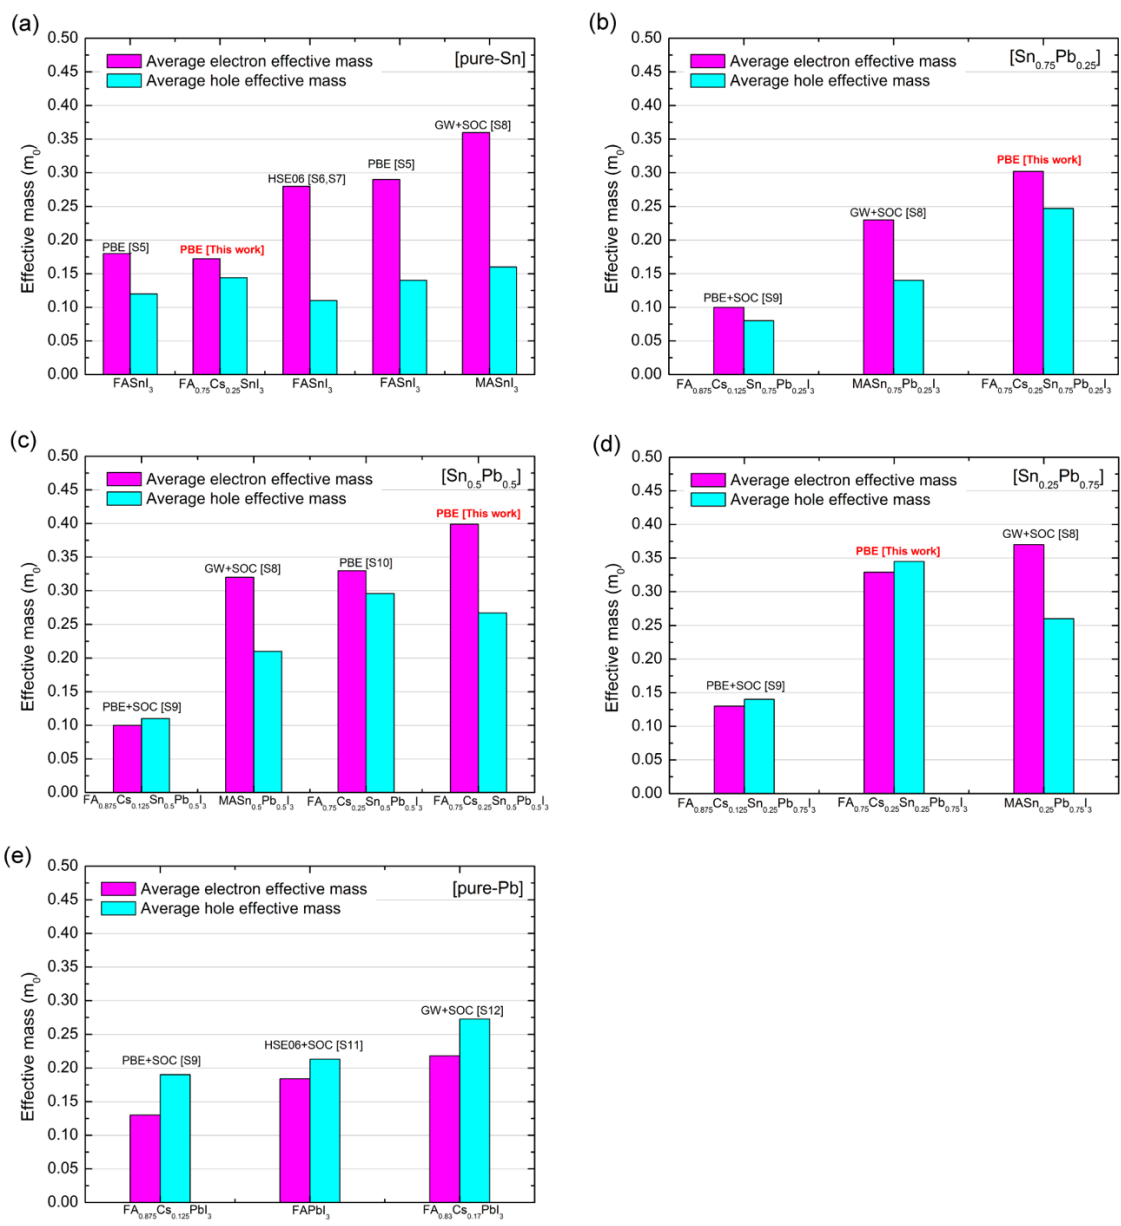

**Figure S4.** DFT calculations of electron (magenta bars) and hole (cyan bars) effective masses with different functionals in pure-Sn, mixed Sn-Pb, and pure-Pb perovskites, (a) pure-Sn, (b)  $\text{Sn}_{0.75}\text{Pb}_{0.25}$ , (c)  $\text{Sn}_{0.5}\text{Pb}_{0.5}$ , (d)  $\text{Sn}_{0.25}\text{Pb}_{0.75}$ , and (e) pure-Pb perovskites.

## References

- [S1] G. E. Eperon, T. Leijtens, K. A. Bush, R. Prasanna, T. Green, J. T. Wang, D. P. McMeekin, G. Volonakis, R. L. Milot, R. May, A. Palmstrom, D. J. Soltcavage, R. A. Belisle, J. B. Patel, E. S. Parrott, R. J. Sutton, W. Ma, F. Moghadam, B. Conings, A. Babayigit, H. -G. Boyen, S. Bent, F. Giustino, L. M. Herz, M. B. Johnston and M. D. McGehee, *Science*, 2016, **354**, 861–865.
- [S2] M. T. Klug, R. L. Milot, J. B. Patel, T. Green, H. C. Sansom, M. D. Farrar, A. J. Ramadan, S. Martani, Z. Wang, B. Wenger, J. M. Ball, L. Langshaw, A. Petrozza, M. B. Johnston, L. M. Herz and H. J. Snaith, *Energy Environ. Sci.*, 2020, **13**, 1776-1787.
- [S3] S. Kahmann, Z. Chen, O. Hordiichuk, O. Nazarenko, S. Shao, M. V. Kovalenko, G. R. Blake, S. Tao and M. A. Loi, *ACS Appl. Mater. Interfaces*, 2022, **14**, 34253-34261.
- [S4] M. Pitaro, J. S. Alonso, L. Di Mario, D. G. Romero, K. Tran, T. Zaharia, M. B. Johansson, E. M. Johansson and M. A. Loi, *J. Mater. Chem. A*, 2023, **1**, 11755-11766.
- [S5] Z. -Q. Ma, H. Pan and P. K. Wong, *J. Electron. Mater.*, 2016, **45**, 5956-5966.
- [S6] M. Roknuzzaman, J. A. Alarco, H. Wang, A. Du, T. Tesfamichael and K. Ostrikov, *Comput. Mater. Sci.*, 2019, **169**, 109118.
- [S7] M. Pitaro, E. K. Tekelenburg, S. Shao and M. A. Loi, *Adv. Mater.*, 2021, **34**, 2105844.
- [S8] A. Goyal, S. McKechnie, D. Pashov, W. Tumas, M. Van Schilfgaarde and V. Stevanovic, *Chem. Mater.*, 2018, **30**, 3920-3928.
- [S9] S. P. Senanayak, K. Dey, R. Shivanna, W. Li, D. Ghosh, Y. Zhang, B. Roose, S. J. Zelewski, Z. Andaji-Garmaroudi, W. Wood, N. Tiwale, J. L. MacManus-Driscoll, R. H. Friend, S. D. Stranks and H. Sirringhaus, *Nat. Mater.*, 2023, **22**, 216-224.
- [S10] X. -F. Diao, Y. -L. Tang, Q. Xie, D. -L. Chen, S. -X. Li and G. -F. Liu, *ACS Omega*, 2019, **4**, 20024-20035.
- [S11] S. Wang, W. B. Xiao and F. Wang, *RSC Adv.*, 2020, **10**, 32364-32369.
- [S12] Z. Muhammad, P. Liu, R. Ahmad, S. J. Asadabadi, C. Franchini and I. Ahmad, *Phys. Chem. Chem. Phys.*, 2020, **22**, 11943-11955.
